# Supplementary material
Source: publisher figshare collection journal article supplement (https://acs.figshare.com/ndownloader/files/7342658)
Supplement: Supplementary file 1 [file 7342658]

## Supporting Information

### The Essential Medicinal Chemistry of Curcumin

Kathryn M. Nelson<sup>a</sup>, Jayme L. Dahlin<sup>b</sup>, Jonathan Bisson<sup>c</sup>, James Graham<sup>c</sup>, Guido F. Pauli<sup>c,d</sup>,  
Michael A. Walters<sup>a,\*</sup>

### AUTHOR AFFILIATIONS

<sup>a</sup> Institute for Therapeutics Discovery and Development, Department of Medicinal Chemistry, University of Minnesota, Minneapolis, MN 55414, USA

<sup>b</sup> Department of Pathology, Brigham and Women's Hospital, Boston, MA 02115, USA

<sup>c</sup> Center for Natural Product Technologies, Department of Medicinal Chemistry and Pharmacognosy, College of Pharmacy, University of Illinois at Chicago, 833 South Wood Street, Chicago, IL 60612, USA

<sup>d</sup> Institute for Tuberculosis Research, College of Pharmacy, University of Illinois at Chicago, 833 South Wood Street, Chicago, IL 60612, USA

### Table of contents

|                                                                |    |
|----------------------------------------------------------------|----|
| Supplemental Table 1.....                                      | S2 |
| Supplemental Table 2.....                                      | S3 |
| Supplemental Table 3.....                                      | S4 |
| Examples of covalent modification of proteins by curcumin..... | S5 |
| References.....                                                | S6 |

**Supplemental Table 1. Prototypical examples of assays reporting curcumin bioactivity.**

| Target                   | Potency                                                                           | Selectivity                                    | Assay descriptions                                                                                           | Comments                                                                                                                                                                                                                                                                   | Ref(s)           |
|--------------------------|-----------------------------------------------------------------------------------|------------------------------------------------|--------------------------------------------------------------------------------------------------------------|----------------------------------------------------------------------------------------------------------------------------------------------------------------------------------------------------------------------------------------------------------------------------|------------------|
| p300                     | IC <sub>50</sub> = ~25 $\mu$ M                                                    | G9a-GST, HDAC1                                 | [ <sup>3</sup> H]acetyl-CoA HAT assays; <i>in vitro</i> transcription assay; cell-based HAT assays           | 1. No detergent in assays<br>2. Incubation times allow for compound degradation<br>3. Micromolar compound concentrations<br>4. Reactive mechanism(s) not excluded                                                                                                          | <sup>1</sup>     |
| HDAC8                    | IC <sub>50</sub> = 115 $\mu$ M                                                    | None                                           | Molecular modeling (docking); fluorometric HDAC assay with HeLa nuclear extract                              | 1. No detergent in assays<br>2. Enzyme source nuclear extract containing other HDACs and HATs<br>3. No counter-screens for fluorescence interference performed<br>4. No evidence of direct target engagement<br>5. Heavy reliance on docking                               | <sup>2</sup>     |
| GSK-3 $\beta$            | IC <sub>50</sub> = 66.3 nM                                                        | None                                           | Docking; tau phosphoELISA assay; liver glycogen in Balb/c mice;                                              | 1. No detergent or thiol-scavenging agents in assays.<br>2. Heavy reliance on docking<br>3. No evidence of direct target engagement<br>4. Long incubation times for <i>in vitro</i> assay; no confirmation of compound stability<br>5. Non-specific <i>in vivo</i> readout | <sup>3</sup>     |
| Tau fibril formation     | IC <sub>50</sub> = 3.5 $\mu$ M                                                    | None                                           | ThT fluorescence assay (primary, AID 1460); FP mP (secondary, AID 1468); FP total (counter-screen, AID 1463) | 1. Long incubation time (6 h) in primary assay<br>2. Fluorescent readouts<br>3. Inactive in FP mP secondary assay<br>4. Active in FP total counter-screen (IC <sub>50</sub> = 13 $\mu$ M)<br>5. Not selected for follow-up (AIDs 1558, 1559, 1712)                         | PubChem AID 1475 |
| Amyloid fibril formation | IC <sub>50</sub> = 1–64 $\mu$ M                                                   | None                                           | ThT fluorescence assay on Tg2576 mouse brain sections; aggregation ELISA (6E10)                              | 1. Fluorescent readouts<br>2. Long incubation times (> 1 h) allow for compound degradation<br>3. Concentrations tested above aggregation threshold<br>4. Follow-up work showed no affect of curcumin on A $\beta$ aggregation states                                       | <sup>4-5</sup>   |
| CFTR                     | appK <sub>i</sub> = 5–15 $\mu$ M (against SERCA)                                  | None                                           | Nasal epithelium potential changes in $\Delta$ F508 mice                                                     | 1. No evidence of target engagement<br>2. No confirmation of compound presence <i>in vivo</i><br>3. Results irreproducible by separate lab                                                                                                                                 | <sup>6</sup>     |
| CB1                      | K <sub>i</sub> = 5.9 nM                                                           | 446-fold over CB2 (K <sub>i</sub> > 2 $\mu$ M) | Incubation with membrane fraction of CHO cells stably expressing CB1 or CB2                                  | 1. Incubation time sufficient for compound degradation<br>2. No orthogonal confirmation of target engagement<br>3. Work retracted when results were irreproducible                                                                                                         | <sup>7-8</sup>   |
| TrxR                     | Rat IC <sub>50</sub> = 3.6 $\mu$ M<br>HeLa cells<br>IC <sub>50</sub> = 15 $\mu$ M | None                                           | DTNB reduction assay; <i>in vitro</i> and with HeLa cells                                                    | 1. Concentrations tested above aggregation threshold<br>2. No detergent in assays<br>3. No target engagement for cellular assay<br>4. Long incubation time (2–6 h) sufficient for degradation                                                                              | <sup>9</sup>     |
| IRAK                     | IC <sub>50</sub> ~ 10 $\mu$ M                                                     | None                                           | Incubation with whole cells; immunoprecipitation/ Western blot detection by anti-IRAK antibodies             | 1. Results do not exclude membrane disruption<br>2. No evidence of target engagement<br>3. Concentrations tested above chemical aggregation threshold                                                                                                                      | <sup>10</sup>    |
| ErbB2                    | Only tested at 50 $\mu$ M                                                         | None                                           | Whole cell incubations; radioassay with immunoprecipitated protein                                           | 1. Results do not exclude membrane disruption<br>2. Incubation time (1–4 h) sufficient for compound degradation<br>3. No confirmation of target engagement<br>4. Concentration tested above chemical aggregation threshold                                                 | <sup>11</sup>    |

**Supplemental Table 2. Reported half-lives of curcumin at a variety of conditions.**<sup>12-13</sup> Note:

RPMI 1640 contains glutathione but no other proteins, lipids, or growth factors.

| pH   | Temperature | Buffer system                  | t <sub>1/2</sub> (min) |
|------|-------------|--------------------------------|------------------------|
| 3.0  | 37 °C       | 0.1 M citrate-phosphate        | 118.63                 |
| 5.0  | 23 °C       | 0.1 M citrate-phosphate        | > 20.0                 |
| 5.0  | 37 °C       | 0.1 M citrate-phosphate        | 199.08                 |
| 6.0  | 23 °C       | 0.1 M citrate-phosphate        | > 20.0                 |
| 6.0  | 37 °C       | 0.1 M phosphate                | 195.69                 |
| 6.5  | 37 °C       | 0.1 M phosphate                | 153.02                 |
| 6.8  | 37 °C       | 0.1 M phosphate                | 39.75                  |
| 7.0  | 23 °C       | 0.1 M citrate-phosphate        | > 20.0                 |
| 7.0  | 37 °C       | RPMI 1640                      | ~ 20.0                 |
| 7.0  | 37 °C       | RPMI 1640 + fetal bovine serum | 360–480                |
| 7.2  | 37 °C       | 0.1 M phosphate                | 9.40                   |
| 7.2  | 37 °C       | 0.5 M phosphate                | 9.54                   |
| 7.2  | 37 °C       | 0.025 M phosphate              | 9.47                   |
| 7.40 | 37 °C       | Human blood                    | 360–480                |
| 7.5  | 23 °C       | 0.1 M citrate-phosphate        | 20.0                   |
| 8.0  | 23 °C       | 0.1 M citrate-phosphate        | ~ 4.0                  |
| 8.0  | 37 °C       | 0.1 M phosphate                | 1.05                   |
| 8.5  | 23 °C       | 0.1 M phosphate                | ~ 7.5                  |
| 9.0  | 23 °C       | 0.1 M phosphate                | ~ 11                   |
| 10.0 | 37 °C       | 0.1 M carbonate                | 14.05                  |

**Supplemental Table 3. Reported activities of curcumin that are potential toxic side effects.** Assay values reported as IC<sub>50</sub> values unless otherwise indicated. AMMC: 3-[2-(N,N-diethyl-N-methylammonium)ethyl]-7-methoxy-4-methylcoumarin; BFC: 7-benzyloxy-4-(trifluoromethyl)-coumarin; BQ: 7-benzyloxyquinoline; CEC: 3-cyano-7-ethoxycoumarin; CDNB: 1-chloro-2,4-dinitrobenzene; DBF: dibenzylfluorescein; EROD: ethoxyresorufin deethylation; K<sub>f</sub> = formation constant; MFC: 7-methoxy-4-(trifluoromethyl)-coumarin; βNF: β-naphthoflavone; PB: phenobarbital; PROD: pentoxyresorufin depropylation;

| Curcumin Reactivity                                                            | Evidence                                                                                                                                                                                                                                                                                                                                                                                                                                                                                                |
|--------------------------------------------------------------------------------|---------------------------------------------------------------------------------------------------------------------------------------------------------------------------------------------------------------------------------------------------------------------------------------------------------------------------------------------------------------------------------------------------------------------------------------------------------------------------------------------------------|
| hERG (KCNH2 potassium voltage-gated channel, subfamily H (EAG-related), member | 5.55 μM, (whole cell patch-clamp HEK293; dose-dependent inhibition) <sup>14</sup><br>4.4 ± 1.4 μM, (thallium influx); 22 μM (patch clamp) <sup>15</sup>                                                                                                                                                                                                                                                                                                                                                 |
| Cellular toxicity                                                              | 31 μM, (murine macrophage cells, J774.1);<br>15.2 μM, (kidney cells, HEK 293T) <sup>16</sup>                                                                                                                                                                                                                                                                                                                                                                                                            |
| CYP450 inhibition                                                              | <b>1A1/1A2:</b> K <sub>i</sub> 0.14 μM, IC <sub>50</sub> 2 μM; (competitive inhibition of EROD activity in βNF-induced rat liver microsomes)<br><b>2B1/2B2:</b> K <sub>i</sub> 76.02 μM, IC <sub>50</sub> 14 μM, (competitive inhibition of PROD activity in PB-induced microsomes) <sup>17</sup><br><b>3A4:</b> 14.9 ± 1.4 μM (BFC); 54.4 ± 18.3 μM (BQ); 44.1 ± 4.2 μM (DBF)<br><b>2C9:</b> 6.0 ± 1.4 μM (MFC)<br><b>2D6:</b> 175 ± 47.0 μM (AMMC)<br><b>1A2:</b> 104.6 ± 22.1 μM (CEC) <sup>18</sup> |
| Glutathione S-transferase activity                                             | K <sub>i</sub> 2.29 μM, inhibition of GST activity toward CDNB <sup>17, 19-20</sup>                                                                                                                                                                                                                                                                                                                                                                                                                     |
| Protein reactivity                                                             | See Table 1                                                                                                                                                                                                                                                                                                                                                                                                                                                                                             |
| Iron chelation                                                                 | K <sub>f</sub> = 10 <sup>22</sup> Fe(III)-curcumin complex. Curcumin induced a phenotype of iron deficiency in mice fed a low-iron diet (5 mg iron/kg) <sup>21</sup> and significantly reduced iron stores in mice fed a Western-type diet. <sup>22</sup>                                                                                                                                                                                                                                               |

### Examples of covalent modification of proteins by curcumin

***TrxR (thioredoxin reductase).*** Curcumin has been reported to covalently modify both Cys<sup>496</sup> and Sec<sup>497</sup> in the C-terminal active site of the cytosolic TrxR1.<sup>9</sup> This ubiquitous enzyme expressed in all living cells is an essential mammalian selenocysteine (Sec)-containing flavoenzyme. It catalyzes the NADPH-dependent reduction of the redox-active disulfide in thioredoxin (Trx), an enzyme that is involved in cellular redox control. Covalent modification leads to an induction of NADPH oxidase activity that leads to an increased production of reactive oxygen species (ROS). The authors of this work speculated that this increase in the production of ROS might be beneficial as there is an overexpression of TrxRs in a variety of tumor types.

***IRAK (interleukin-1 (IL-1) receptor-associated kinase).*** Another reported covalent target of curcumin is IRAK.<sup>10</sup> This kinase features five vicinal cysteines, four of which are located near arginine or histidine residues, making them particularly sensitive to reaction with electrophiles. Recruitment of IRAK to the IL-1 receptor is an early event in inflammatory signaling cascades. Alkylation of IRAK thiols by curcumin was demonstrated in a murine T-cell line stably overexpressing IKAK (EL-4<sup>IRAK</sup>).

***ErbB2.*** Finally, curcumin has been shown to covalently modify ErbB2 (Her2/neu), a transmembrane tyrosine kinase that acts as a coreceptor for other epithelial growth factor receptors. This covalent modification initiates the CHIP-dependent ErbB2 ubiquitination that leads to ErbB2 depletion.<sup>11</sup> ErbB2 was immunoprecipitated from cell lysates and [<sup>3</sup>H]-curcumin binding was evaluated. The radioactivity signal increased from protein incubated with [<sup>3</sup>H]-curcumin was competed away with cold curcumin.

## REFERENCES

1. Balasubramanyam, K.; Varier, R. A.; Altaf, M.; Swaminathan, V.; Siddappa, N. B.; Ranga, U.; Kundu, T. K., Curcumin, a novel p300/CREB-binding protein-specific inhibitor of acetyltransferase, represses the acetylation of histone/nonhistone proteins and histone acetyltransferase-dependent chromatin transcription. *J. Biol. Chem.* **2004**, *279*, 51163–51171.
2. Bora-Tatar, G.; Dayangac-Erden, D.; Demir, A. S.; Dalkara, S.; Yelekci, K.; Erdem-Yurter, H. Molecular modifications on carboxylic acid derivatives as potent histone deacetylase inhibitors: Activity and docking studies. *Bioorg. Med. Chem.* **2009**, *17*, 5219–5228.
3. Bustanji, Y.; Taha, M. O.; Almasri, I. M.; Al-Ghussein, M. A. S.; Mohammad, M. K.; Alkhatib, H. S. Inhibition of glycogen synthase kinase by curcumin: Investigation by simulated molecular docking and subsequent *in vitro/in vivo* evaluation. *J. Enzyme Inhib. Med. Chem.* **2009**, *24*, 771–778.
4. Yang, F.; Lim, G. P.; Begum, A. N.; Ubeda, O. J.; Simmons, M. R.; Ambegaokar, S. S.; Chen, P. P.; Kaye, R.; Glabe, C. G.; Frautschy, S. A.; Cole, G. M., Curcumin inhibits formation of amyloid  $\beta$  oligomers and fibrils, binds plaques, and reduces amyloid *in vivo*. *J. Biol. Chem.* **2005**, *280*, 5892–5901.
5. Chin, D.; Huebbe, P.; Pallauf, K.; Rimbach, G. Neuroprotective properties of curcumin in Alzheimer's disease - merits and limitations. *Curr. Med. Chem.* **2013**, *20*, 3955–3985.
6. Egan, M. E.; Pearson, M.; Weiner, S. A.; Rajendran, V.; Rubin, D.; Gloeckner-Pagel, J.; Canny, S.; Du, K.; Lukacs, G. L.; Caplan, M. J. Curcumin, a major constituent of turmeric, corrects cystic fibrosis defects. *Science (Washington, DC, U. S.)* **2004**, *304*, 600–602.

7. Prather, P. L.; Seely, K. A.; Levi, M. S. Notice of retraction. *J. Pharmacol. Exp. Ther.* **2009**, *331*, 1147.
8. Seely, K. A.; Levi, M. S.; Prather, P. L. The dietary polyphenols trans-resveratrol and curcumin selectively bind human CB1 cannabinoid receptors with nanomolar affinities and function as antagonists/inverse agonists. *J. Pharmacol. Exp. Ther.* **2009**, *330*, 31–39.
9. Fang, J.; Lu, J.; Holmgren, A. Thioredoxin reductase is irreversibly modified by curcumin: A novel molecular mechanism for its anticancer activity. *J. Biol. Chem.* **2005**, *280*, 25284–25290.
10. Jurrmann, N.; Birgelius-Flohe, R.; Boel, G.-F. Curcumin blocks interleukin-1 (IL-1) signaling by inhibiting the recruitment of the IL-1 receptor-associated kinase IRAK in murine thymoma EL-4 cells. *J. Nutr.* **2005**, *135*, 1859–1864.
11. Jung, Y.; Xu, W.; Kim, H.; Ha, N.; Neckers, L. Curcumin-induced degradation of ErbB2: A role for the E3 ubiquitin ligase CHIP and the Michael reaction acceptor activity of curcumin. *Biochim. Biophys. Acta* **2007**, *1773*, 383–390.
12. Wang, Y.-J.; Pan, M.-H.; Cheng, A.-L.; Lin, L.-I.; Ho, Y.-S.; Hsieh, C.-Y.; Lin, J.-K. Stability of curcumin in buffer solutions and characterization of its degradation products. *J. Pharm. Biomed. Anal.* **1997**, *15*, 1867–1876.
13. Griesser, M.; Pistis, V.; Suzuki, T.; Tejera, N.; Pratt, D. A.; Schneider, C. Autoxidative and cyclooxygenase-2 catalyzed transformation of the dietary chemopreventive agent curcumin. *J. Biol. Chem.* **2011**, *286*, 1114–1124.
14. Hu, C.-W.; Sheng, Y.; Zhang, Q.; Liu, H.-B.; Xie, X.; Ma, W.-C.; Huo, R.; Dong, D.-L. Curcumin inhibits hERG potassium channels *in vitro*. *Toxicol. Lett.* **2012**, *208*, 192–196.

15. Xia, M.; Shahane, S. A.; Huang, R.; Titus, S. A.; Shum, E.; Zhao, Y.; Southall, N.; Zheng, W.; Witt, K. L.; Tice, R. R.; Austin, C. P. Identification of quaternary ammonium compounds as potent inhibitors of hERG potassium channels. *Toxicol. App. Pharmacol.* **2011**, *252*, 250–258.
16. Glaser, J.; Holzgrabe, U. Focus on PAINS: False friends in the quest for selective anti-protozoal lead structures from nature? *MedChemComm* **2016**, *7*, 214–223.
17. Oetari, S.; Sudibyo, M.; Commandeur, J. N. M.; Samhoedi, R.; Vermeulen, N. P. E. Effects of curcumin on cytochrome P450 and glutathione S-transferase activities in rat liver. *Biochem. Pharmacol.* **1996**, *51*, 39–45.
18. Bamba, Y.; Yun, Y. S.; Kunugi, A.; Inoue, H. Compounds isolated from *curcuma aromatica* Salisb. inhibit human P450 enzymes. *J. Nat. Med.* **2011**, *65*, 583–587.
19. Awasthi, S.; Pandya, U.; Singhal, S. S.; Lin, J. T.; Thiviyanathan, V.; Seifert, W. E.; Awasthi, Y. C.; Ansari, G. A. S. Curcumin-glutathione interactions and the role of human glutathione S-transferase P1-1. *Chem.-Biol. Interact.* **2000**, *128*, 19–38.
20. Mathews, S.; Rao, M. N. A. Interaction of curcumin with glutathione. *Int. J. Pharm.* **1991**, *76*, 257–259.
21. Jiao, Y.; Wilkinson, J. I. V.; Di, X.; Wang, W.; Hatcher, H.; Kock, N. D.; D'Agostino, R., Jr.; Knovich, M. A.; Torti, F. M.; Torti, S. V. Curcumin, a cancer chemopreventive and chemotherapeutic agent, is a biologically active iron chelator. *Blood* **2009**, *113*, 462–469.
22. Chin, D.; Huebbe, P.; Frank, J.; Rimbach, G.; Pallauf, K. Curcumin may impair iron status when fed to mice for six months. *Redox Biol.* **2014**, *2*, 563–569.
